# Supplementary material for: A viologen-based coordination polymer exhibiting high sensitivity towards various light sources
Source: Royal Society of Chemistry journal article supplement (doi:10.1039/c6ce02496c), 2016-12-20
Supplement: c6ce02496c1.pdf [file c6ce02496c1.pdf]

## Supporting Information

### A viologen-based coordination polymer exhibiting high sensitivity towards various light sources

Wen-Bo Li,<sup>a</sup> Qing-Xia Yao,<sup>\*b</sup> Li Sun,<sup>a</sup> Xiao-Dong Yang,<sup>a</sup> Rui-Yun Guo<sup>a</sup> and Jie Zhang<sup>\*a</sup>

<sup>a</sup>Beijing Key Laboratory of Photoelectric/Electrophotonic Conversion Materials, MOE Key Laboratory of Cluster Science, School of Chemistry and Chemical Engineering, Beijing Institute of Technology, Beijing 100081, PR China. Email: [Zhangjie68@bit.edu.cn](mailto:Zhangjie68@bit.edu.cn)

<sup>b</sup>School of Chemistry and Chemical Engineering, and Shandong Provincial Key Laboratory of Chemical Energy Storage and Novel Cell Technology, Liaocheng University, Liaocheng 252000, PR China. Email: [yaoqxlcu@126.com](mailto:yaoqxlcu@126.com)

\*\*\*\*\*

#### Additional Data and Figures

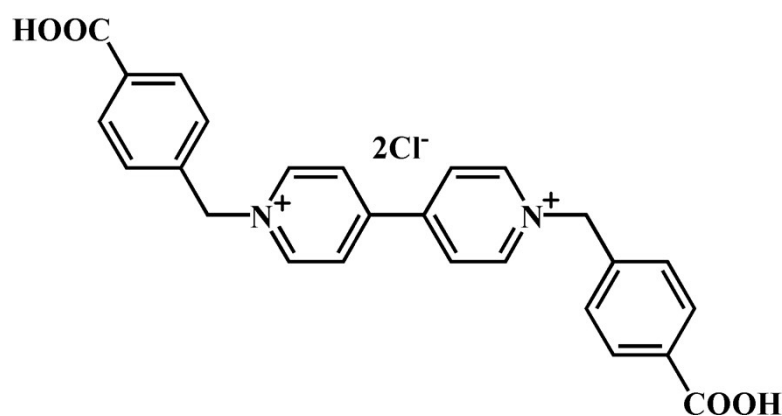

Scheme S1 H<sub>2</sub>bpybcCl<sub>2</sub>

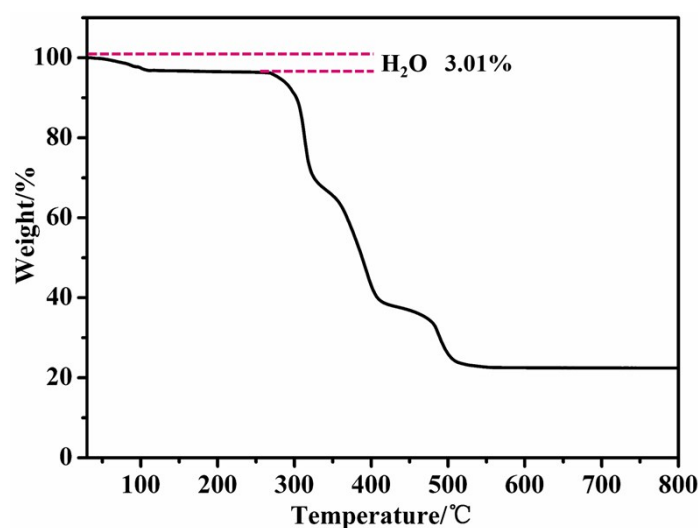

**Fig. S1** The TGA curves of **1Y**. The weight loss of 3.01% (calcd 2.8%) up to 120 °C corresponds to the loss of one free water molecule.

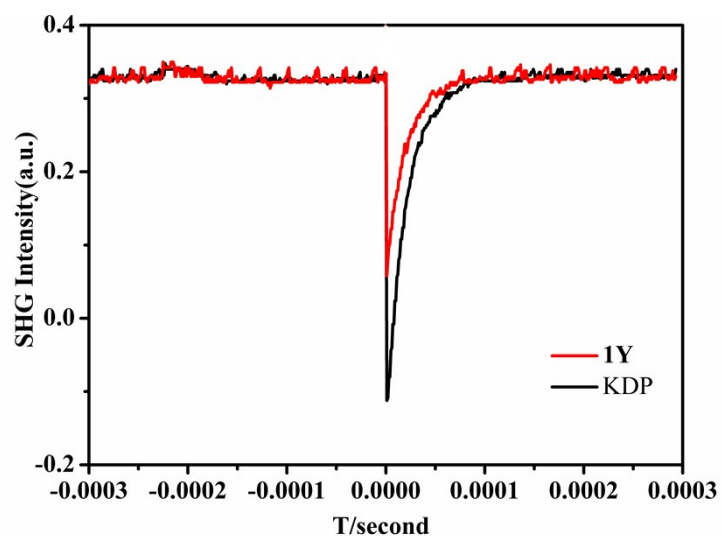

**Fig. S2** Oscilloscope traces of SHG signals for the powder of **1Y** and KDP in the same particle size distribution of 100–140 mesh.

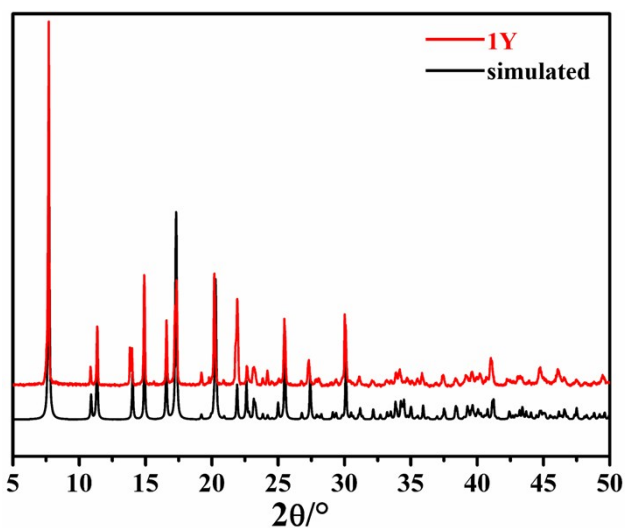

**Fig. S3** Experimental and simulated powder *X*-ray diffraction (PXRD) patterns of **1Y**. After measurement, a color change from yellow to green can be observed.

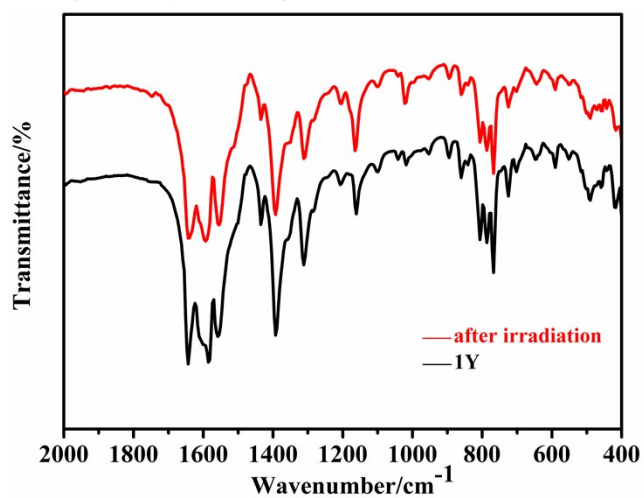

**Fig. S4** The IR spectra of **1Y** before and after irradiation.

Table S1 C-H<sub>py</sub>...O<sub>ox</sub> hydrogen bonds between oxalate anions and bipyridinium rings.

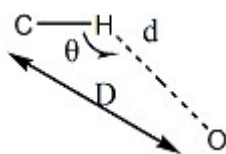

| C-H <sub>py</sub> ...O <sub>ox</sub> | d <sub>H...O</sub> (Å) | D <sub>C...O</sub> (Å) | θ <sub>C-H...O</sub> (°) |
|--------------------------------------|------------------------|------------------------|--------------------------|
| C16-H16...O8                         | 2.751                  | 3.467                  | 132.75                   |
| C17-H17...O8'                        | 2.487                  | 3.366                  | 153.99                   |
| C11-H11...O6                         | 2.631                  | 3.428                  | 141.82                   |
| C10-H10...O6'                        | 2.671                  | 3.557                  | 155.49                   |
